# Supplementary material for: CoOx nanoparticles loaded on carbon spheres with synergistic effects for effective inhibition of shuttle effect in Li–S batteries
Source: Royal Society of Chemistry journal article supplement (doi:10.1039/d2nr07194k), 2023-01-01
Supplement: d2nr07194k1.pdf [file d2nr07194k1.pdf]

## Supporting Information

CoO<sub>x</sub> nanoparticles loaded on carbon spheres with synergistic effects for effective inhibition of shuttle effect in Li-S batteries

Ning Chai <sup>a,b,1</sup>, Yujie Qi <sup>b,c,1</sup>, Junnan Chen <sup>b,c</sup>, Qinhua Gu <sup>b,c</sup>, Ming Lu <sup>b,d</sup>, Xia Zhang <sup>a\*</sup>, Bingsen Zhang <sup>b,c\*</sup>

*a Department of Chemistry, College of Science, Northeastern University, Shenyang 110819, China*

*b Shenyang National Laboratory for Materials Science, Institute of Metal Research, Chinese Academy of Sciences, Shenyang 110016, China*

*c School of Materials Science and Engineering, University of Science and Technology of China, Shenyang 110016, China*

*d The Joint Laboratory of MXene Materials, Key Laboratory of Functional Materials Physics and Chemistry of the Ministry of Education, Key Laboratory of Preparation and Application of Environmental Friendly Materials of the Ministry of Education, Jilin Normal University, Changchun 130103, China*

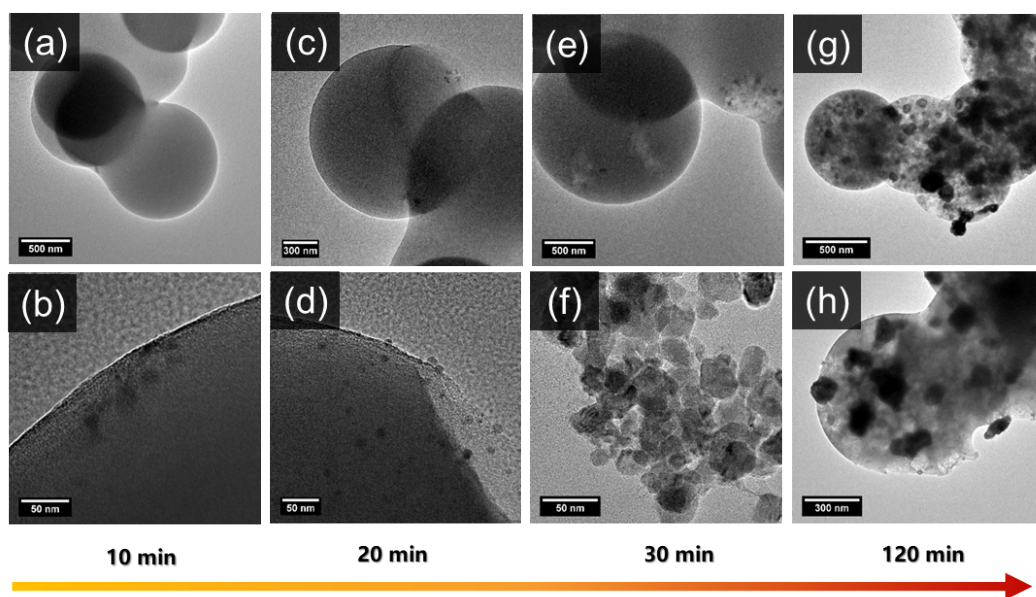

**Fig. S1.** TEM images of  $\text{CoO}_x/\text{CS}$  composites heated at 600 °C for 10 min (a, b), 20 min (c, d), 30 min (e, f) and 120 min (g, h).

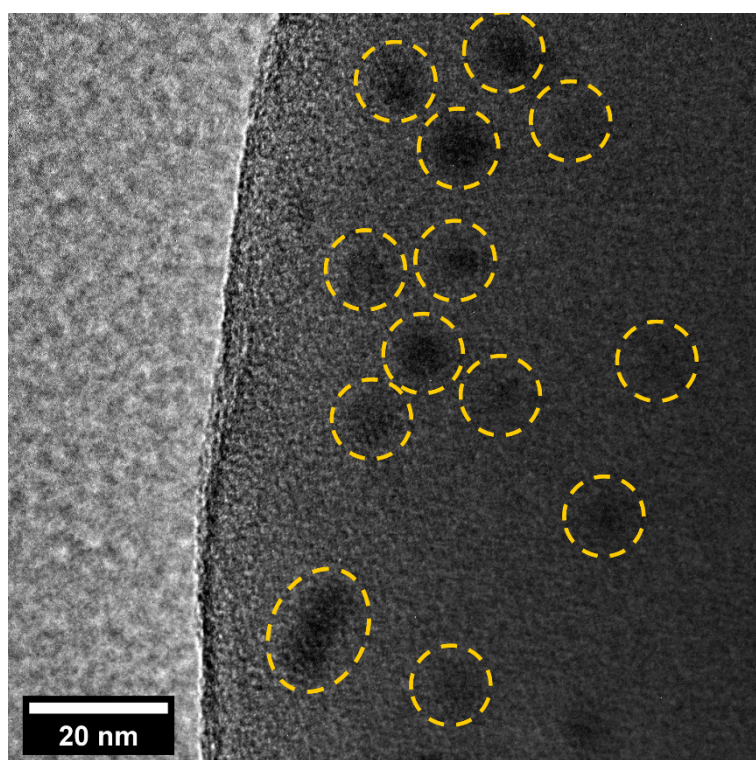

**Fig. S2.** TEM image of  $\text{CoO}_x/\text{CS}$  composites.

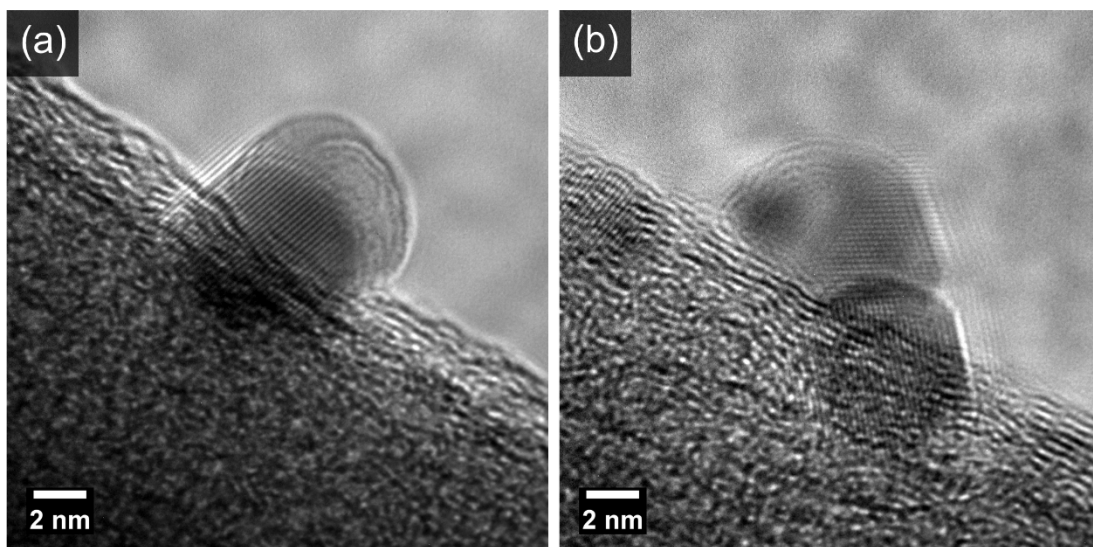

Fig. S3. HRTEM images of  $\text{CoO}_x$  nanoparticles.

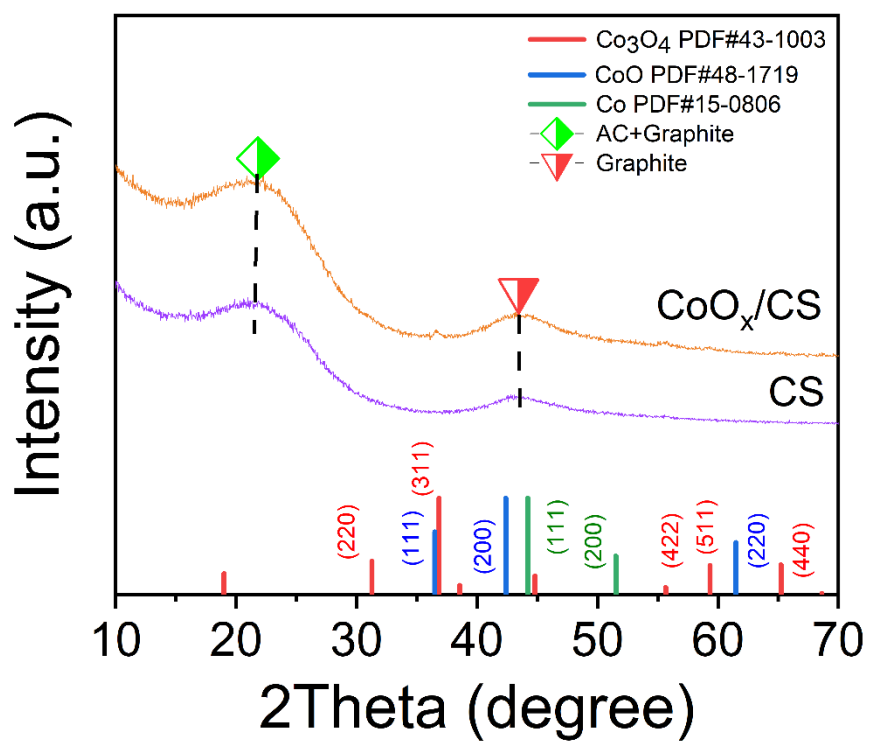

Fig. S4. XRD patterns of CS and  $\text{CoO}_x/\text{CS}$  composites heated at 600 °C for 20 min.

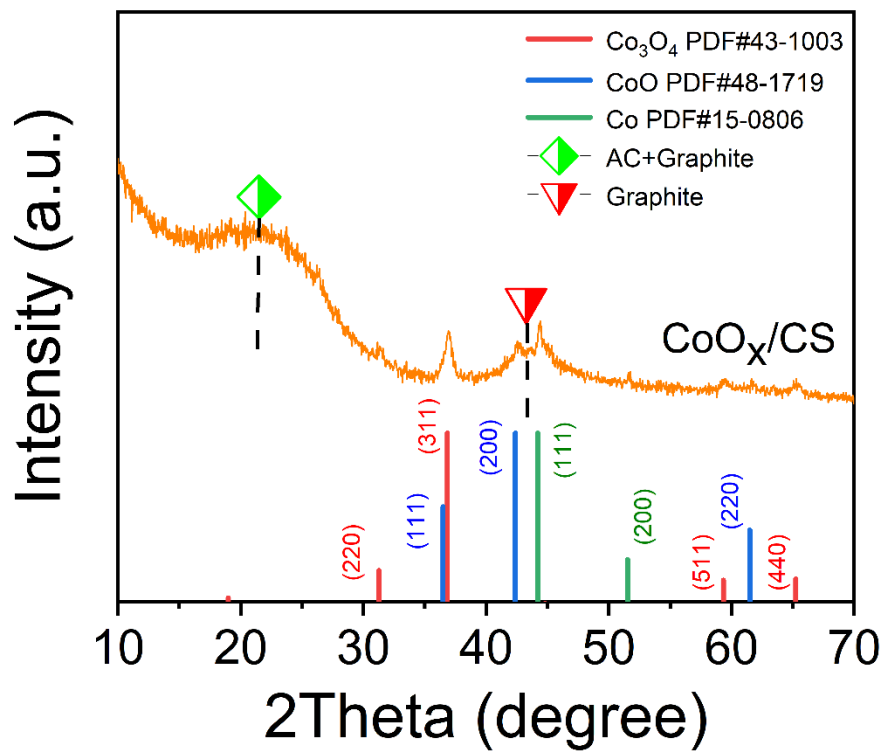

**Fig. S5.** XRD pattern of  $\text{CoO}_x/\text{CS}$  composites heated at 600 °C for 2 h.

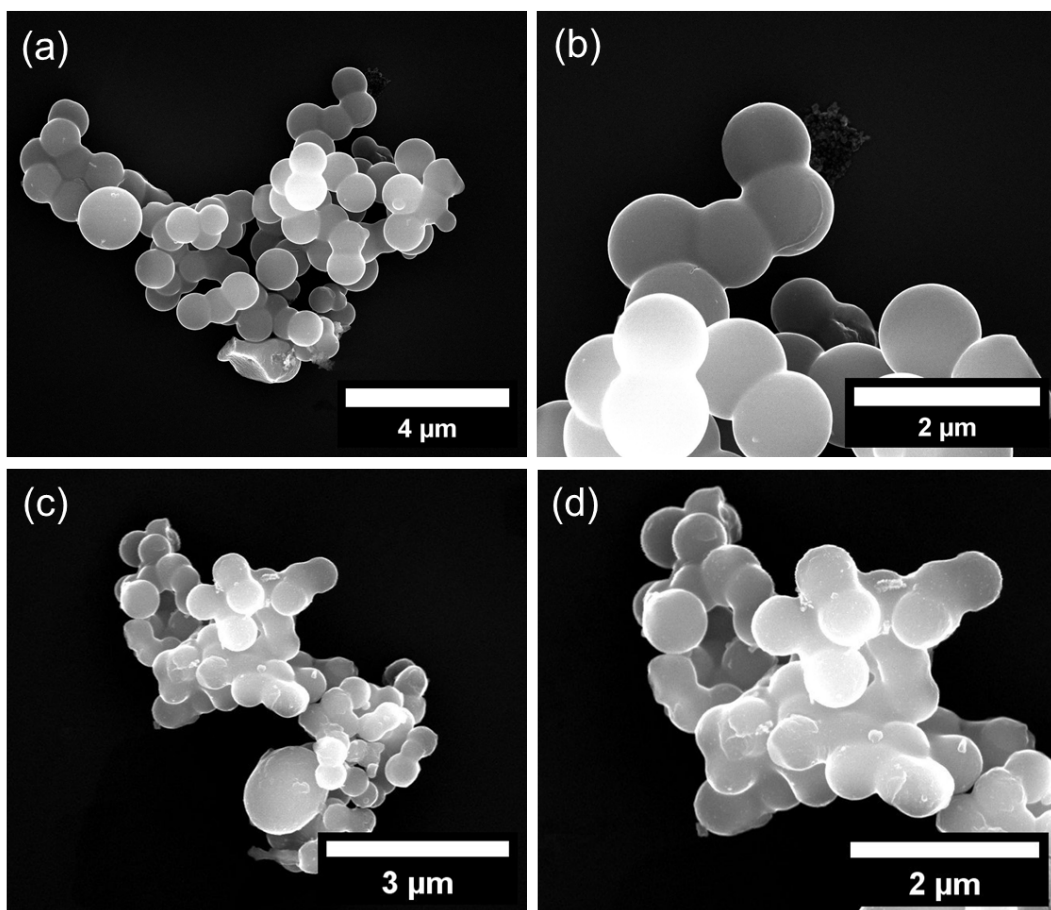

**Fig. S6.** SEM images of CS (a, b) and CoO<sub>x</sub>/CS composites (c, d).

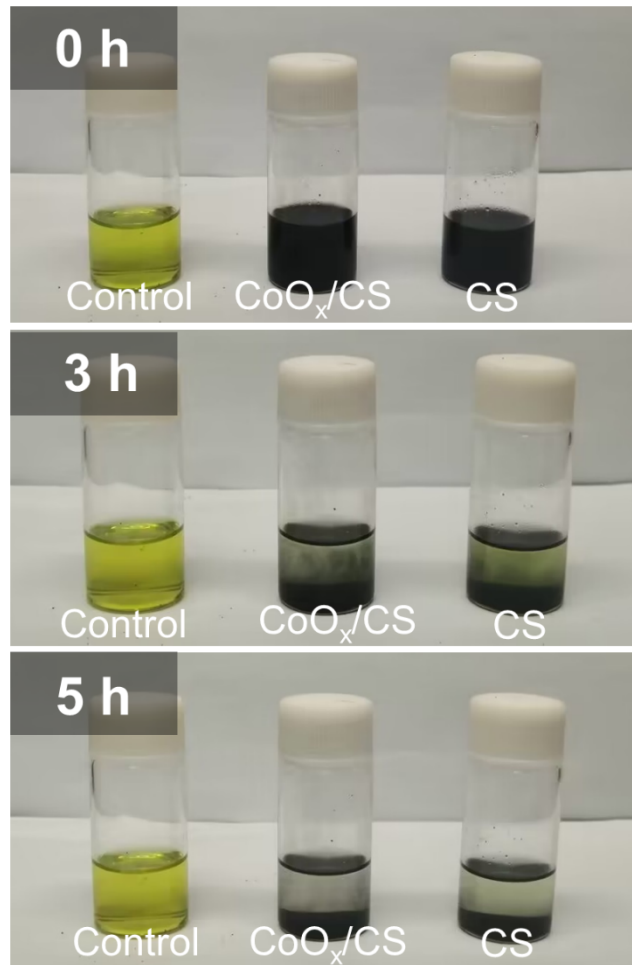

**Fig. S7.** Visual adsorption results of CoO<sub>x</sub>/CS and CS powders in Li<sub>2</sub>S<sub>6</sub> solution.

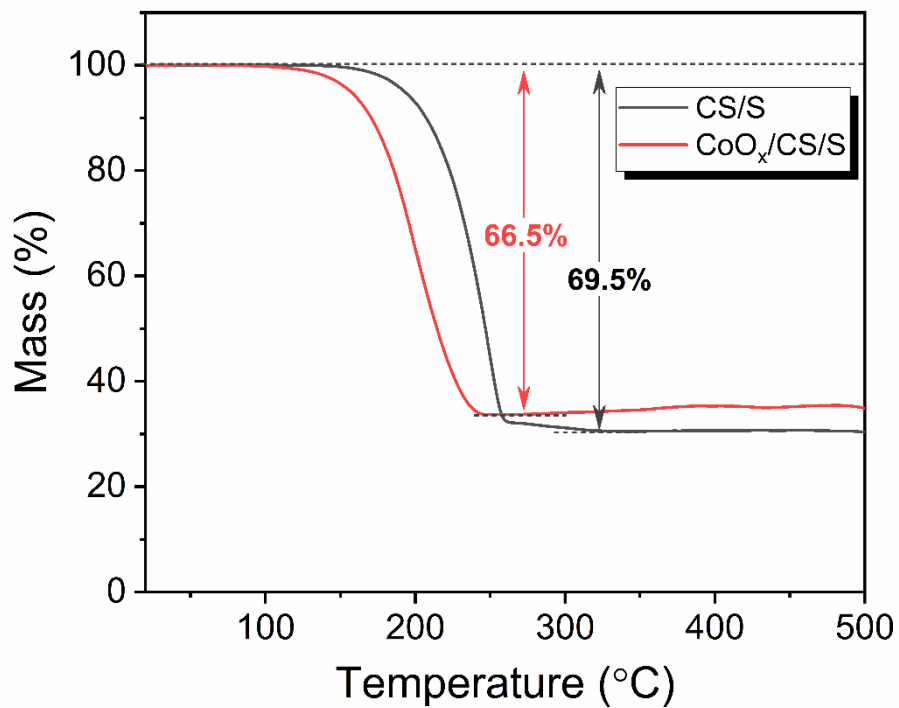

**Fig. S8.** TG analysis curves of CS/S and CoO<sub>x</sub>/CS/S electrode materials under N<sub>2</sub> flow.

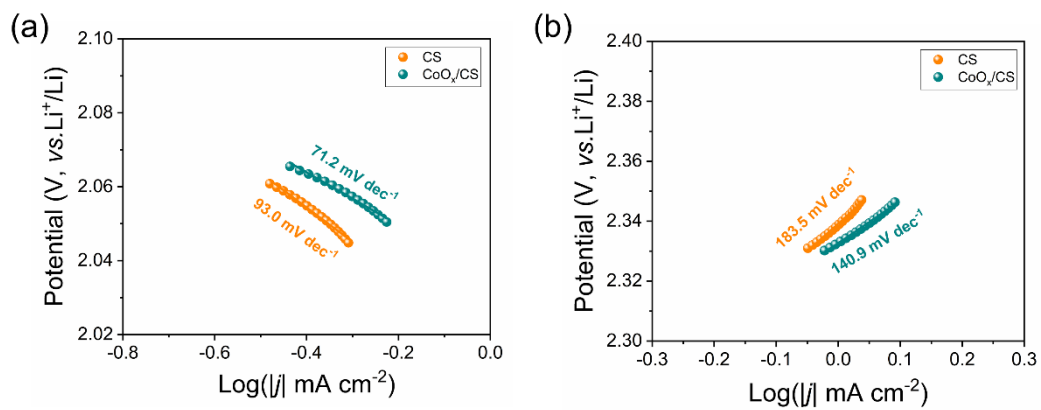

**Fig. S9.** Tafel plots calculated from reduction peak at 2.0 V (a) and oxidation peak at 2.4 V (b) in Fig. 5a.



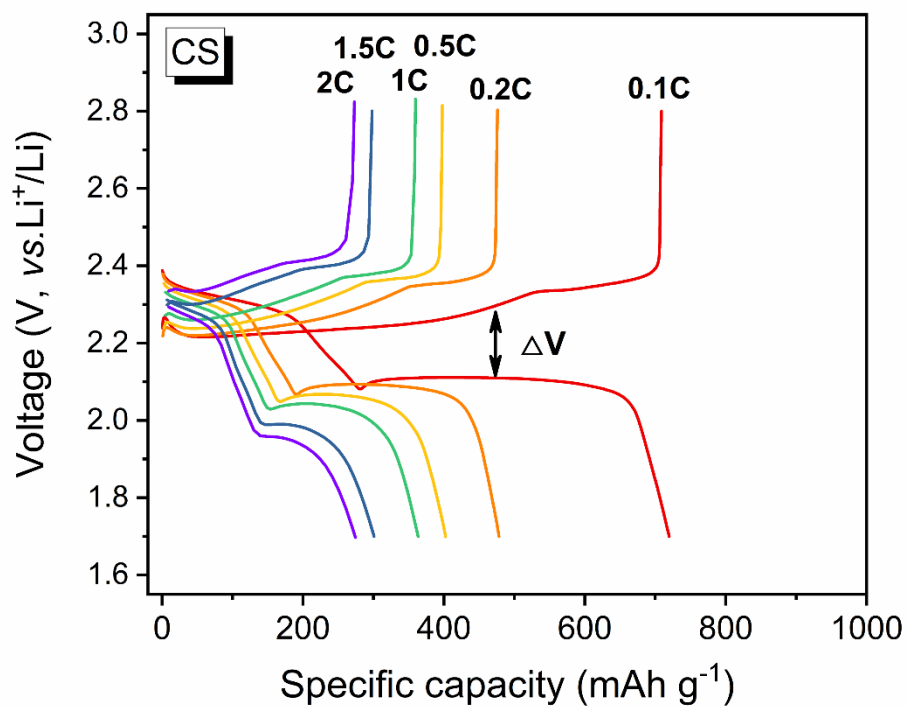

**Fig. S10.** Galvanostatic charge-discharge profile of CS/S electrode at various current densities.

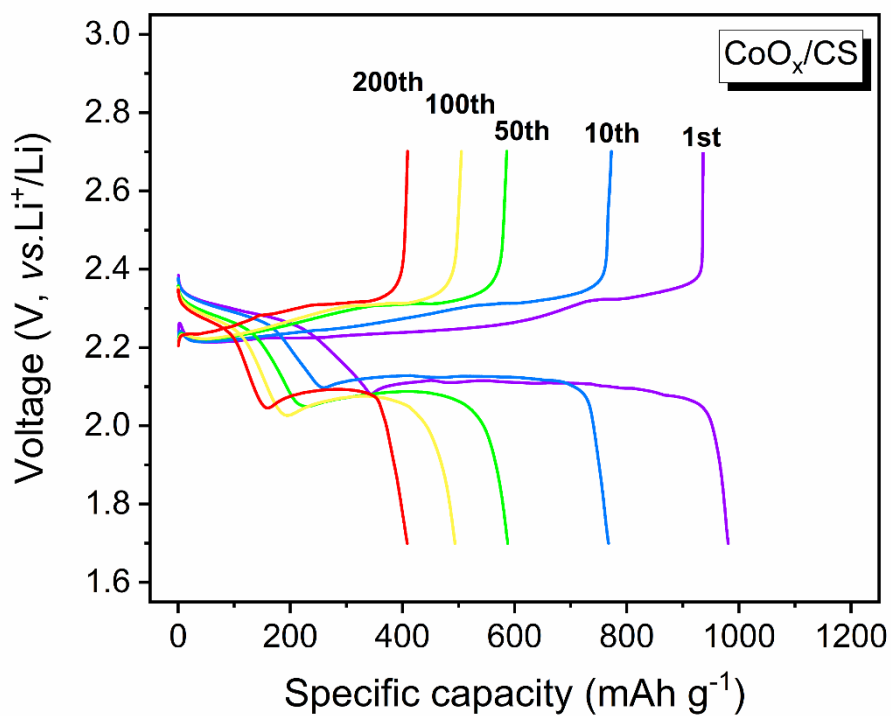

**Fig. S11.** Galvanostatic discharge/charge profiles of CoO<sub>x</sub>/CS full battery cycling at 0.1 C.

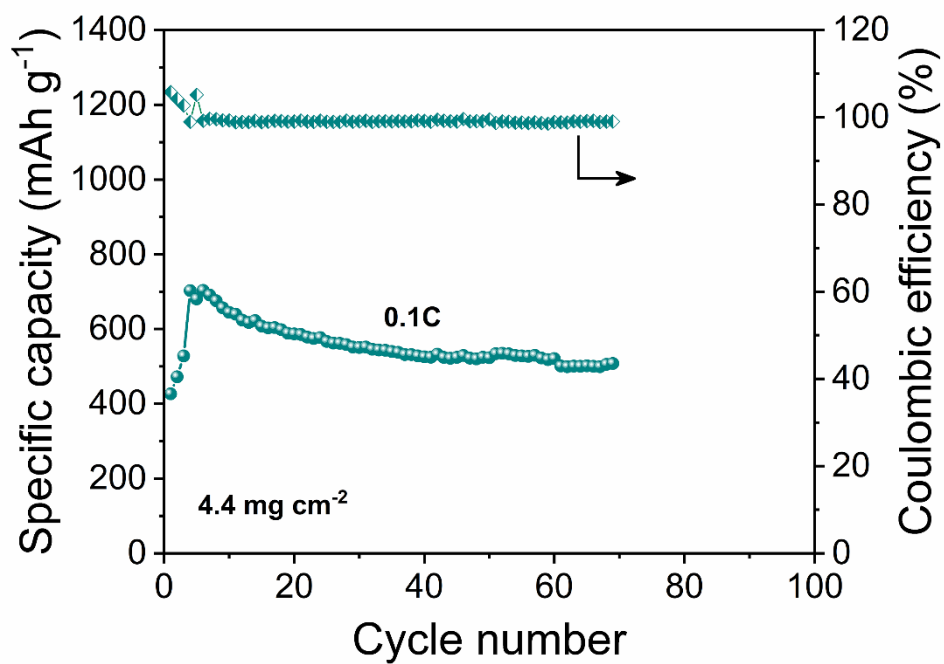

**Fig. S12.** Cycling performance of CoO<sub>x</sub>/CS electrode with high S loading of 4.4 mg cm<sup>-2</sup>.

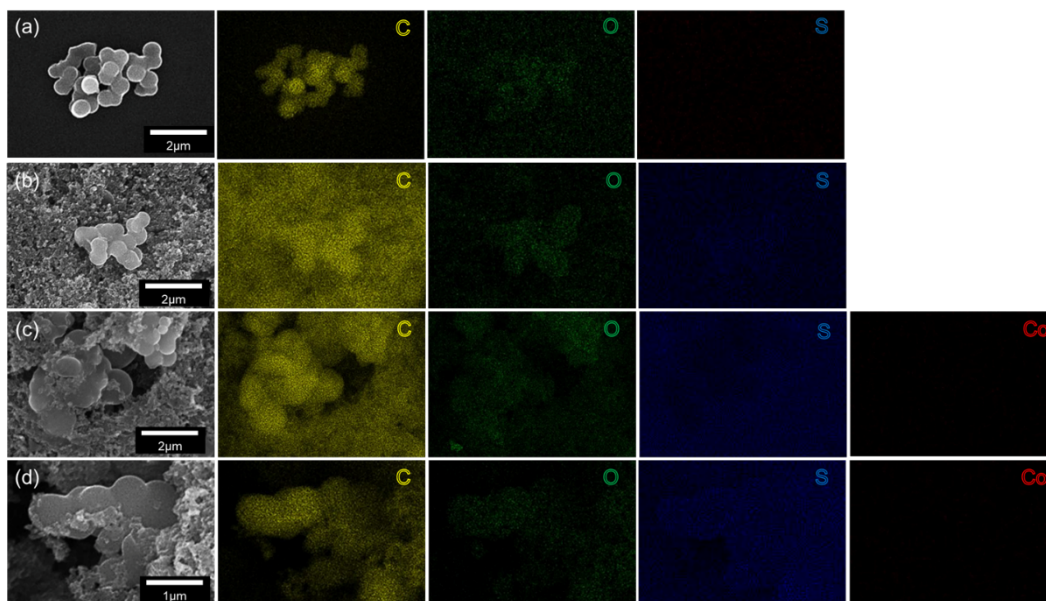

**Fig. S13.** SEM images and EDX elemental maps of  $\text{CoO}_x/\text{CS}$  composites (a),  $\text{CS}/\text{CS}$  composites (after cycling) (b),  $\text{CoO}_x/\text{CS}/\text{S}$  electrode (before cycling) (c), and  $\text{CoO}_x/\text{CS}/\text{S}$  electrode (after cycling) (d).

The physical confinement of LiPSs from CS matrix, which has been verified by our recent work<sup>[1]</sup>, could play an important role in inhibiting shuttle effect.

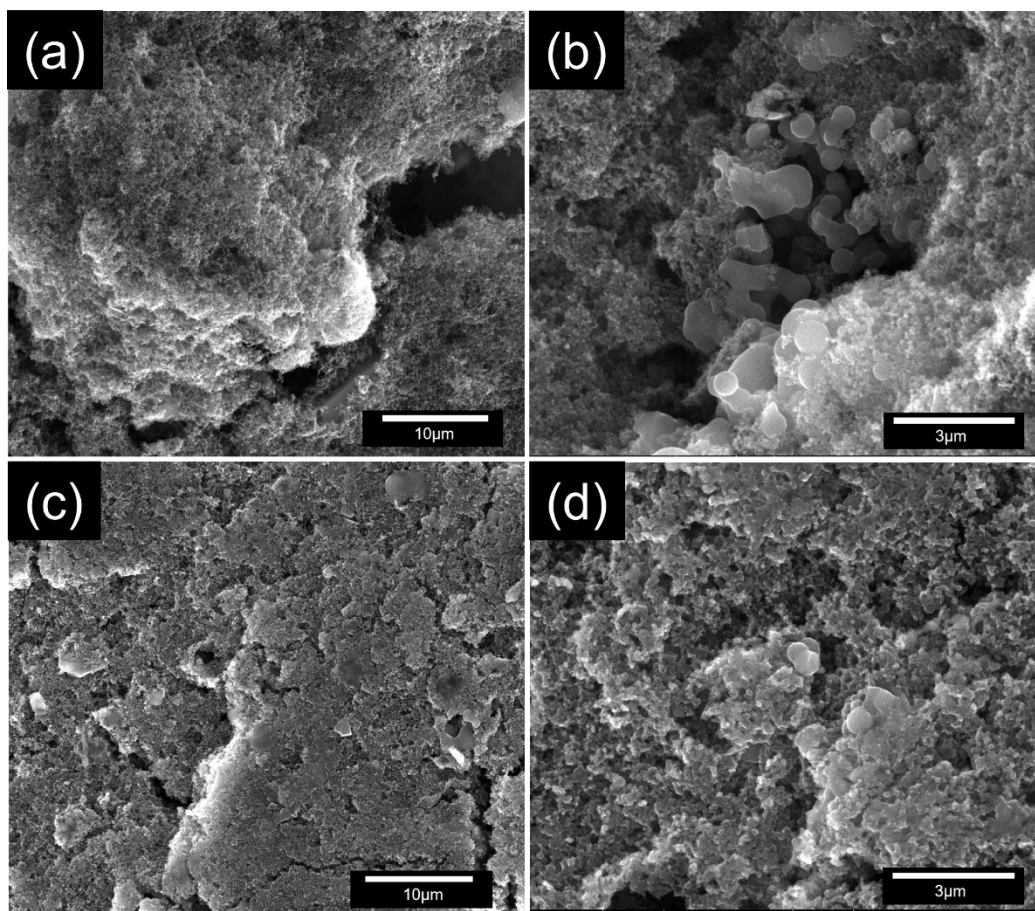

**Fig. S14.** SEM images of  $\text{CoO}_x/\text{CS}/\text{S}$  composites before cycling (a, b) and after cycling (c, d).

**Table S1.** The surface area, pore volume and pore size of CS and CoO<sub>x</sub>/CS composites heated at 600 °C for 20 min.

| Samples                         | S <sub>BET</sub> (m <sup>2</sup> g <sup>-1</sup> ) | Pore Volume (cm <sup>3</sup> g <sup>-1</sup> ) | Pore Size (nm) |
|---------------------------------|----------------------------------------------------|------------------------------------------------|----------------|
| CS                              | 325.1                                              | 0.137                                          | 1.7            |
| CoO <sub>x</sub> /CS composites | 473.5                                              | 0.199                                          | 1.7            |

**Table S2.** The relative contents of various bond configurations in C 1s high resolution XPS spectra.

| Samples              | Relative content (%) |     |     |       |
|----------------------|----------------------|-----|-----|-------|
|                      | C-C                  | C-O | C=O | O-C=O |
| CS                   | 82.4                 | 9   | 4.6 | 4     |
| CoO <sub>x</sub> /CS | 83.3                 | 9.4 | 4.2 | 3.1   |



**Table S3.** The relative contents of various bond configurations in O 1s high resolution XPS spectra.

| Samples              | Relative content (%) |      |      |       |
|----------------------|----------------------|------|------|-------|
|                      | Co-O                 | C-O  | C=O  | O-C=O |
| CS                   | 0                    | 27.1 | 30.8 | 42.1  |
| CoO <sub>x</sub> /CS | 15.7                 | 18.7 | 24.8 | 40.8  |

**Table S4.** The relative contents of various bond configurations in C 1s high resolution XPS spectra of CoO<sub>x</sub>/CS electrode before and after cycling.

| Samples                               | Relative content (%) |         |     |       |
|---------------------------------------|----------------------|---------|-----|-------|
|                                       | C-C                  | C-O/C-S | C=O | O-C=O |
| CoO <sub>x</sub> /CS/S before cycling | 66.1                 | 16.2    | 4.0 | 13.7  |
| CoO <sub>x</sub> /CS/S after cycling  | 69.3                 | 12.6    | 5.4 | 12.7  |



**Table S5.** The relative contents of various bond configurations in O 1s high resolution XPS spectra of CoO<sub>x</sub>/CS electrode before and after cycling.

| Samples                               | Relative content (%) |     |      |       |      |
|---------------------------------------|----------------------|-----|------|-------|------|
|                                       | Co-O                 | C-O | C=O  | O-C=O | S-O  |
| CoO <sub>x</sub> /CS/S before cycling | 1.4                  | 0.4 | 64.5 | 16.2  | 17.5 |
| CoO <sub>x</sub> /CS/S after cycling  | 5.5                  | 0.1 | 41.5 | 11.3  | 41.6 |

**Table S6.** The relative contents of various bond configurations in S 2p high resolution XPS spectra of CoO<sub>x</sub>/CS/S electrode before and after cycling.

| Samples                               | Relative content (%) |      |         |             |         |
|---------------------------------------|----------------------|------|---------|-------------|---------|
|                                       | Sulfide              | S-S  | Sulfite | Thiosulfate | Sulfate |
| CoO <sub>x</sub> /CS/S before cycling | 0.9                  | 11.7 | 18.6    | 34.7        | 34.1    |
| CoO <sub>x</sub> /CS/S after cycling  | 8.1                  | 5.5  | 31.0    | 35.2        | 20.2    |

**Table S7.** The relative contents of various bond configurations in Co 2p high resolution XPS spectra of CoO<sub>x</sub>/CS composites and CoO<sub>x</sub>/CS/S electrode before and after cycling.

| Samples                               | Relative content (%) |      |      |      |
|---------------------------------------|----------------------|------|------|------|
|                                       | Co                   | Co-O | Co-S | Sat. |
| CoO <sub>x</sub> /CS composites       | 44.4                 | 27.8 | 0    | 27.8 |
| CoO <sub>x</sub> /CS/S before cycling | 25.6                 | 10.0 | 22.8 | 41.6 |
| CoO <sub>x</sub> /CS/S after cycling  | 15.4                 | 17.2 | 32.6 | 34.8 |

## References

- [1] Y.J. Qi, N. Chai, Q.H. Gu, J.N. Chen, M. Lu, X. Zhang, B.S. Zhang, Chem. Eng. J. 435 (2022) 135112.
